# Supplementary material for: Yeasts, arthropods, and environmental matrix: a triad to disentangle the multi-level definition of biodiversity
Source: PubMed Central journal article supplement — Sci Rep. 2024 Aug 30;14:20144. doi: 10.1038/s41598-024-70327-4 (PMC11362455; doi:10.1038/s41598-024-70327-4), 2024-08-30

Supplementary material  
for  
**Yeasts, arthropods, and environmental matrix: a triad to disentangle the multi-level  
definition of biodiversity**

Beatrice Valentini, Margherita Penna, Massimiliano Viazzo, Enrico Caprio, Luca Pietro  
Casacci, Francesca Barbero, Irene Stefanini

This document includes:

Supplementary Figures

**Supplementary Figure 1:** Details on selected sites.

**Supplementary Figure 2:** Comparison of the composition of the environmental matrix among the selected vineyards.

**Supplementary Figure 3:** Invertebrates monitored and/or sampled through different sampling approaches

**Supplementary Figure 4:** Comparison of the arthropods monitored through pitfall analysis.

**Supplementary Figure 5:** Comparison of the Lepidoptera monitored through visual census.

**Supplementary Figure 6:** Comparison of the Apoidetes monitored through visual census.

**Supplementary Figure 7:** Comparison of orthoptera monitored through malaise approach.

**Supplementary Figure 8:** Comparison of orthoptera monitored through direct sampling and entomological umbrella approaches.

**Supplementary Figure 9:** Relationship between yeast and source arthropods alpha diversities.

**Supplementary Figure 10:** Yeast vectoring potential of insects.

**Supplementary Figure 11:** Associations between insect vectors and yeast species.

**Supplementary Figure 12:** Multi-level correlations among orthoptera and environmental matrix features.

Additional supplementary documents include:

**Supplementary Table 1:** Details on sites

**Supplementary Table 2:** Information on invertebrates monitored with the different techniques.

**Supplementary Table 3:** List of yeasts isolated from the microbiologically investigated invertebrates.

**Supplementary Figure 1: Details on selected sites. A)** Significant difference between the seven clusters for each characteristic of the environmental matrix analyzed. **B)** GIS environmental matrix for each of the six selected vineyards. The legend description is provided in **Supplementary Table 1**. **C)** Details on the distribution of the pitfalls in each vineyard.

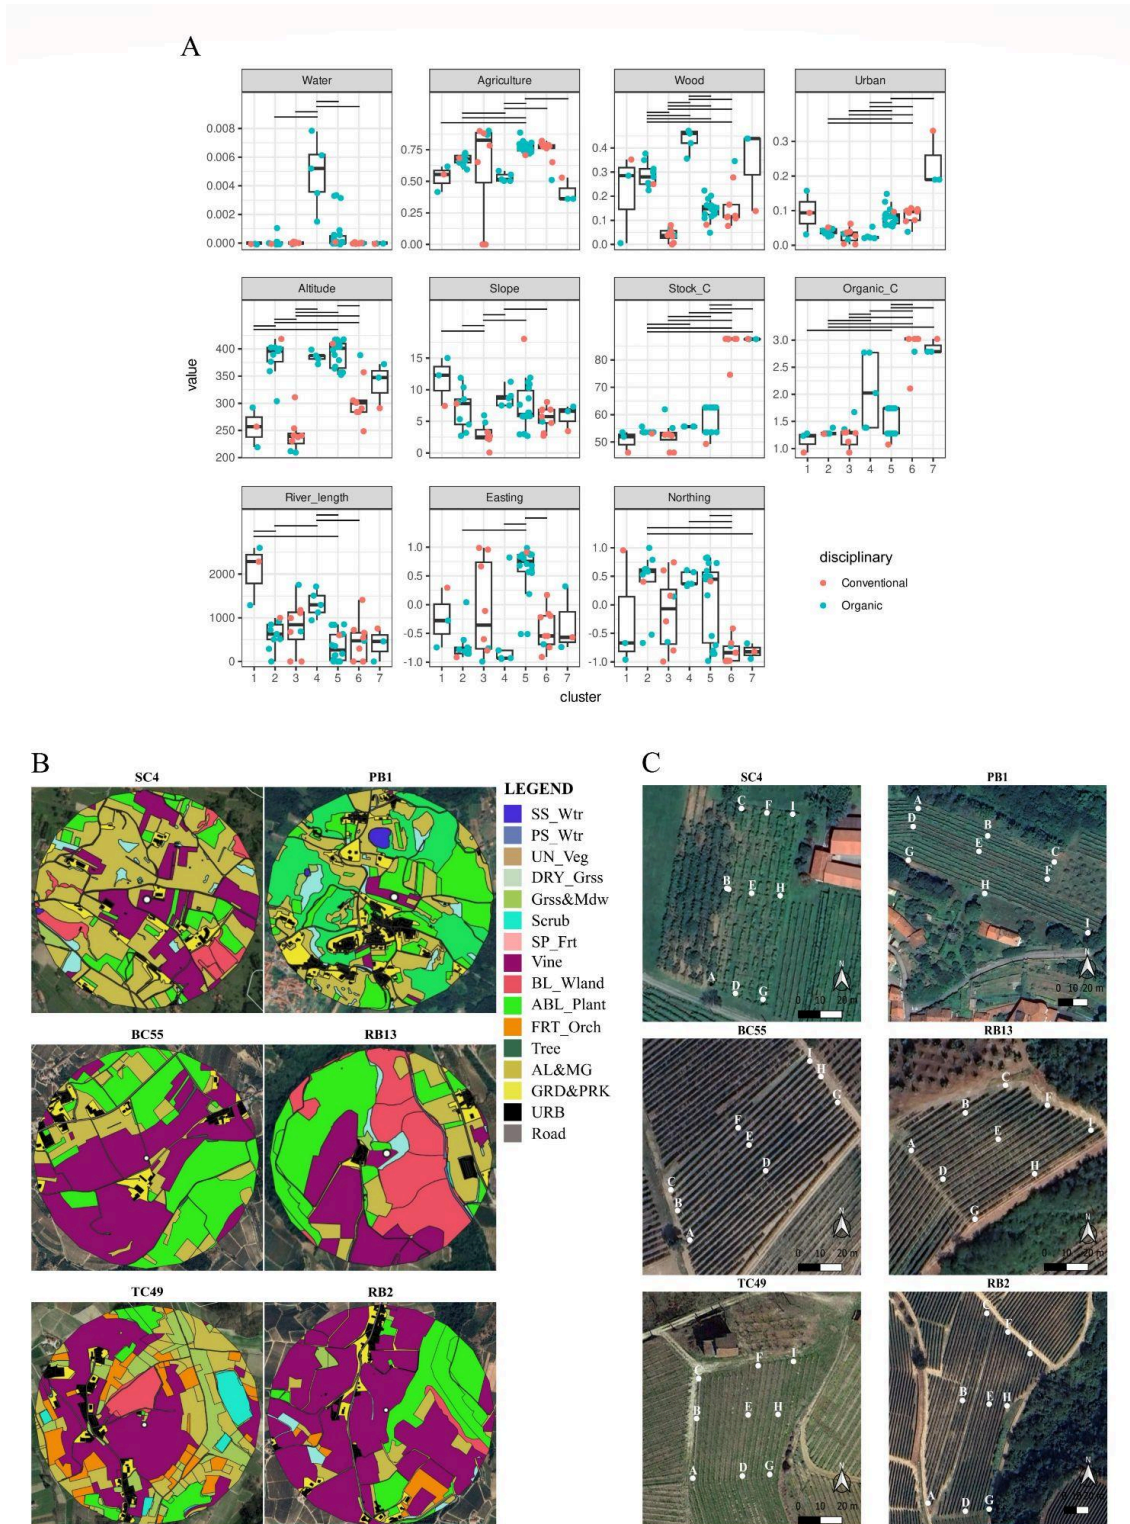

## Supplementary Figure 2

**Comparison of the composition of the environmental matrix among the selected vineyards.** **A)** boxplot indicating the sites' Shannon indexes, quantified according to the number of distinct entities composing the environmental matrix per sampling point. horizontal black lines= Wilcoxon-Mann-Whitney  $fdr < 0.05$  (values reported in **Supplementary Table 1**). **B)** NMDS representation of environmental matrix Bray-Curtis diversity (permAnova on samples grouped by vineyard and management  $fdr < 0.05$ ).

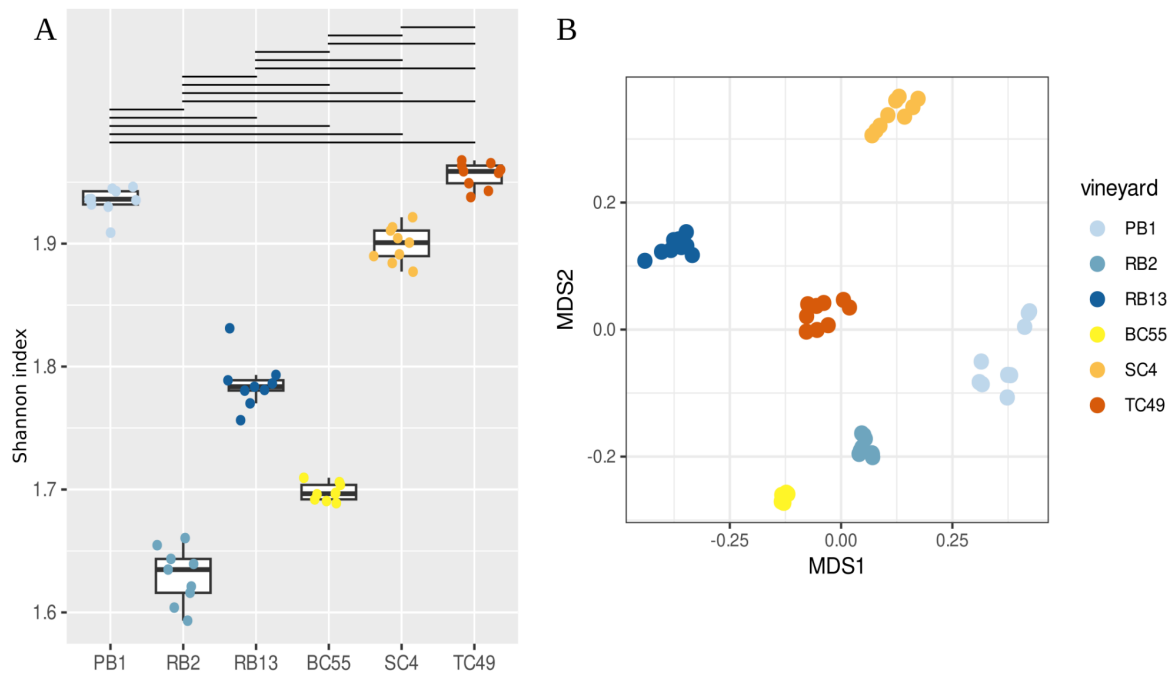

### Supplementary Figure 3

#### Invertebrates monitored and/or sampled through different sampling approaches.

Approaches were adopted according to the targeted invertebrates: A) pitfall traps to explore soil invertebrates, and visual census for gathering information on Lepidoptera (B), Apoidetes (C), (D) malaises for flying insects, entomological umbrella (E) for collecting invertebrates directly from the vine plant.

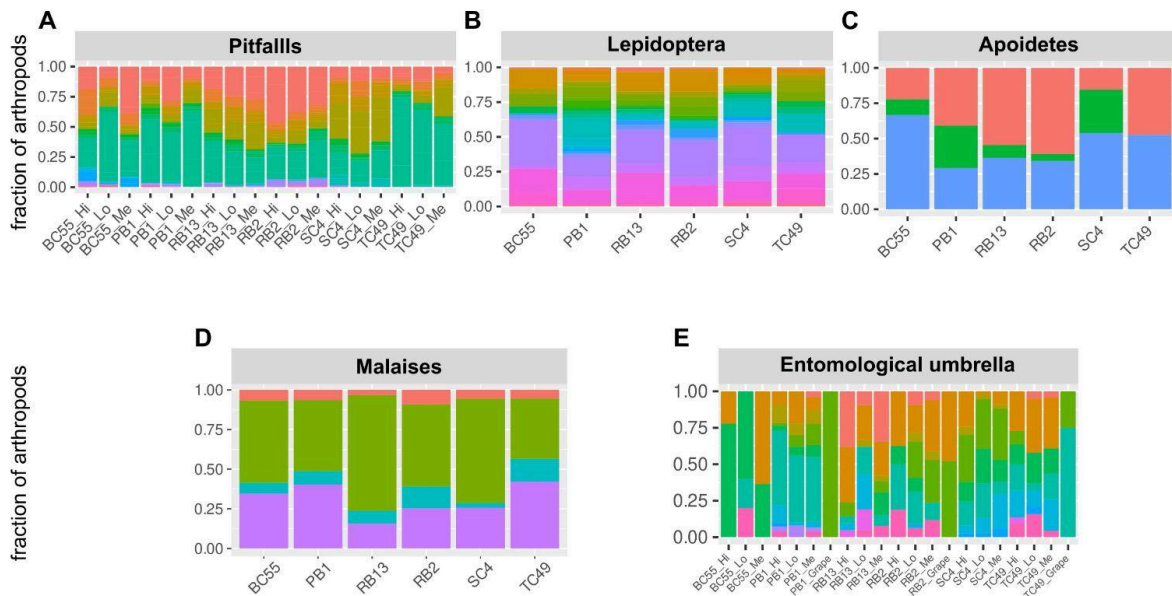

#### Legend Pitfalls (A)

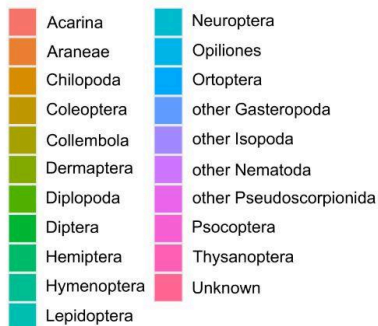

#### Legend Lepidoptera (B)

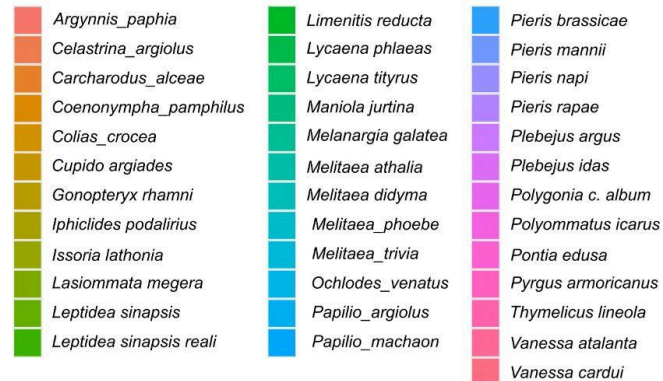

#### Legend Apoidetes (C)

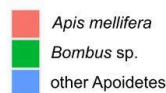

#### Legend Malaises (D)

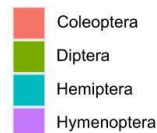

#### Legend entomological umbrella (E)

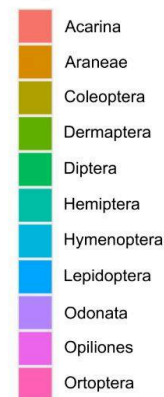

### Supplementary Figure 4

**Comparison of the arthropods monitored through pitfall analysis.** **A)** boxplot indicating the sites' Shannon indexes, quantified according to the number of distinct Orders monitored per sampling point (3 different vineyard rows each with 3 pitfalls). Horizontal lines indicate Wilcoxon-Mann-Whitney  $fdr < 0.05$  (statistics reported in **Supplementary Table 2**). **B)** Spearman correlations between the pitfall alpha diversity and environmental features. **C)** NMDS representation of monitored arthropods' Bray-Curtis diversity (permAnova statistics in **Supplementary Table 2**).

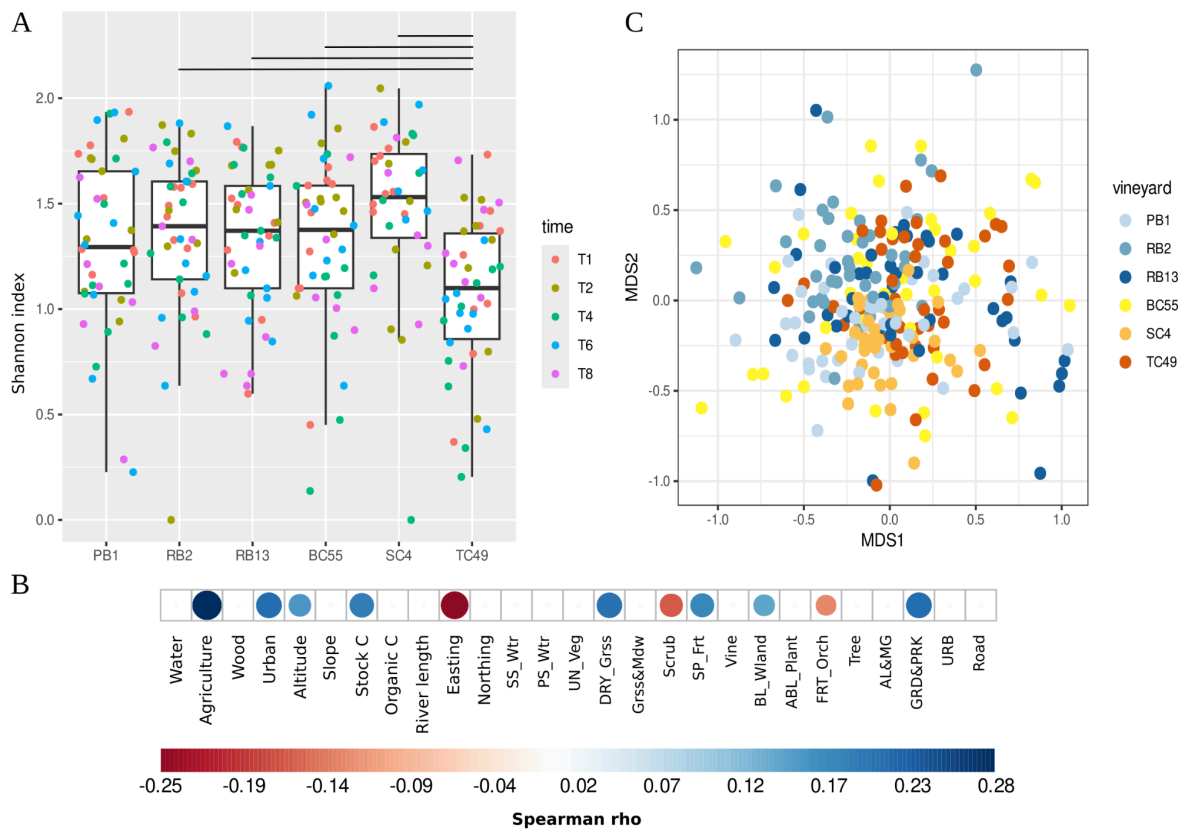

### Supplementary Figure 5

**Comparison of the Lepidoptera monitored through visual census.** **A)** boxplot indicating the sites' Shannon indexes, quantified according to the number of distinct Lepidoptera species monitored per sampling point (1 sampling for 7 time-points). Horizontal lines indicate Wilcoxon-Mann-Whitney  $fdr < 0.05$  (statistics reported in **Supplementary Table 2**). **B)** Spearman correlations between the pitfall alpha diversity and environmental features. **C)** NMDS representation of monitored Lepidoptera Bray-Curtis diversity (permAnova statistics in **Supplementary Table 2**).

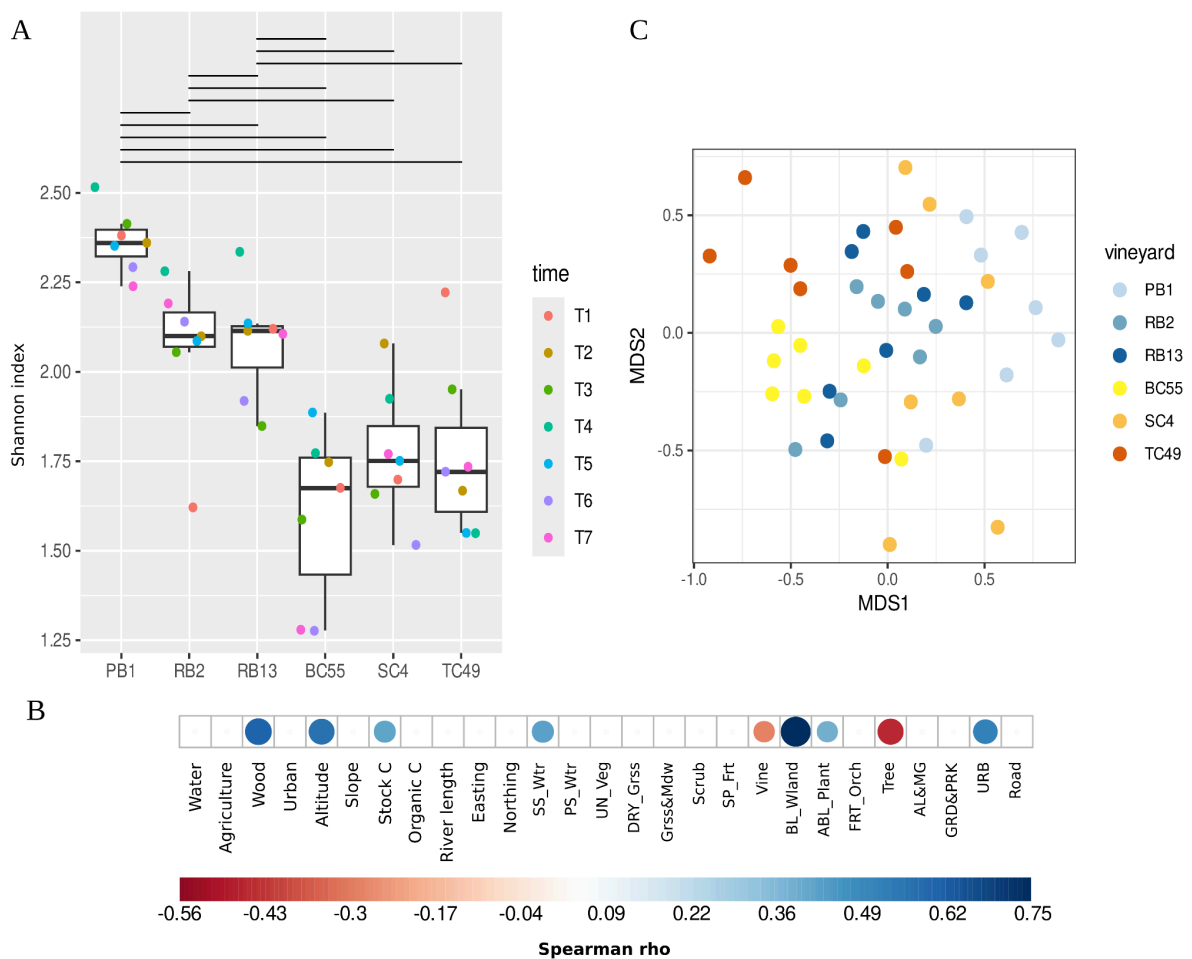

### Supplementary Figure 6

**Comparison of the Apoidetes monitored through visual census.** **A)** boxplot indicating the sites' Shannon indexes, quantified according to the number of distinct Apoidetes monitored per sampling point (1 sampling for 4 time-points). **B)** NMDS representation of monitored Apoidetes Bray-Curtis diversity (permAnova on samples grouped by management  $fdr < 0.05$ ).

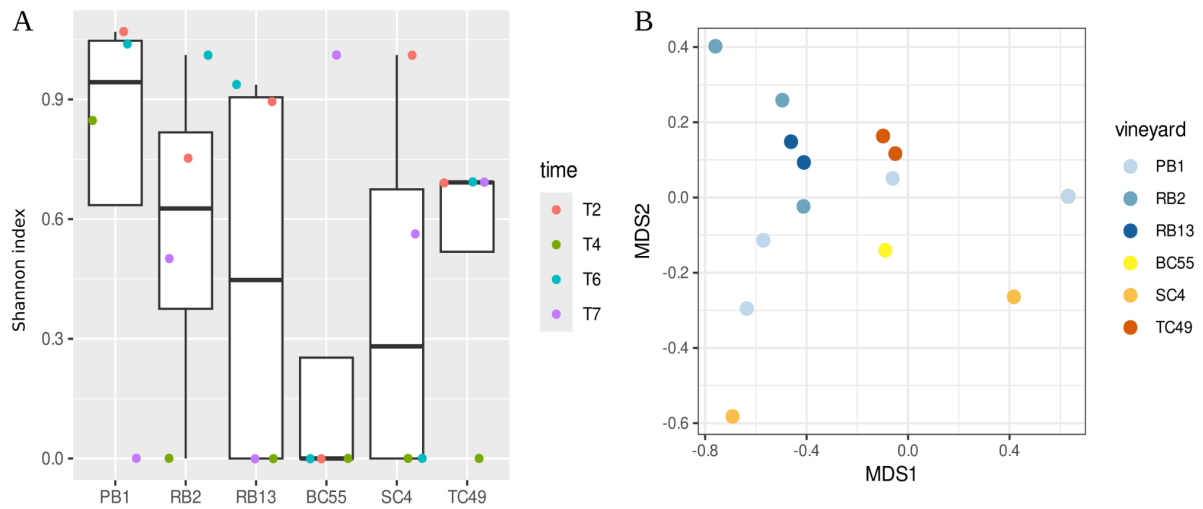

### Supplementary Figure 7

**Comparison of arthropods monitored through malaise approach.** **A)** boxplot indicating the sites' Shannon indexes, quantified according to the number of distinct arthropods monitored per sampling point (1 sampling for 4 time-points). **B)** NMDS representation of monitored arthropods Bray-Curtis diversity.

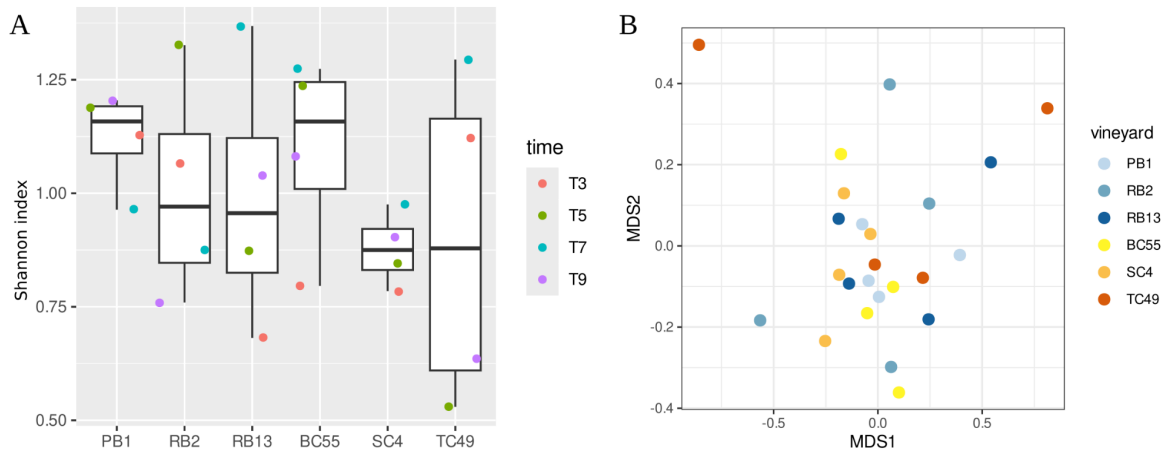



### Supplementary Figure 8

**Comparison of arthropods monitored through direct sampling and entomological umbrella approaches.** **a)** boxplot indicating the sites' Shannon indexes, quantified according to the number of distinct Orders monitored per sampling point (3 different vineyard rows for two time-points). **b)** Spearman correlations between the pitfall alpha diversity and environmental features. *Italics numbers indicate the correlation frd (only significant correlations are shown).* **c)** NMDS representation of monitored arthropods' Bray-Curtis diversity (permAnova on samples grouped by vineyard and management  $fdr < 0.05$ ).

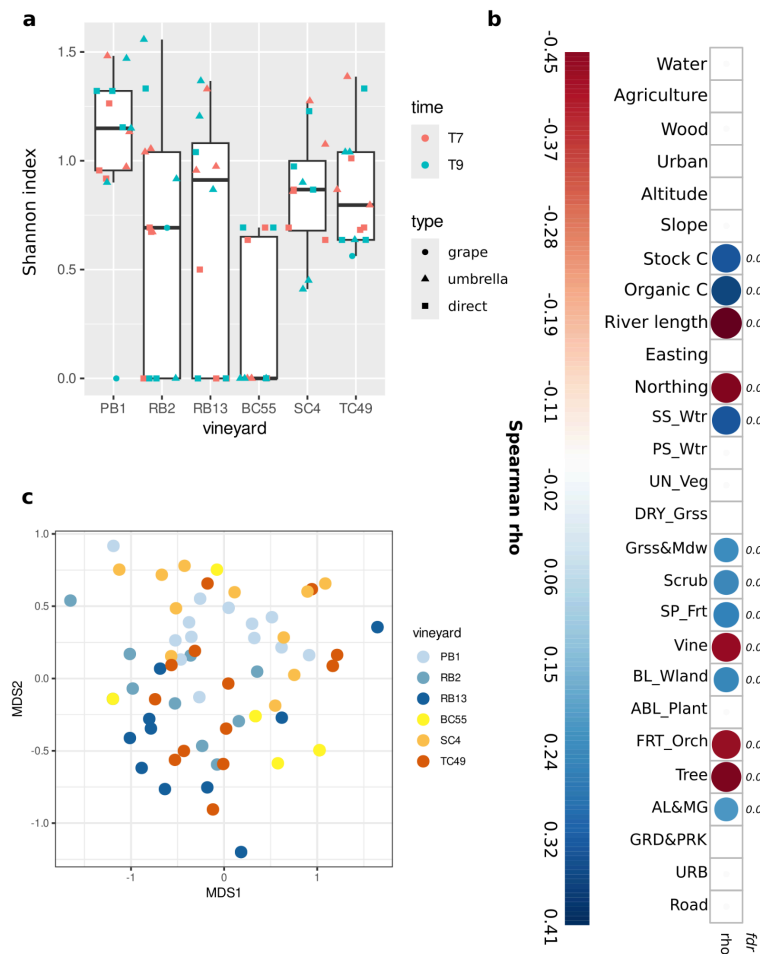

### Supplementary Figure 9

**Relationship between yeast and source arthropods alpha diversities.** The blue line represents the glm fitting with the relative error (gray shadow).

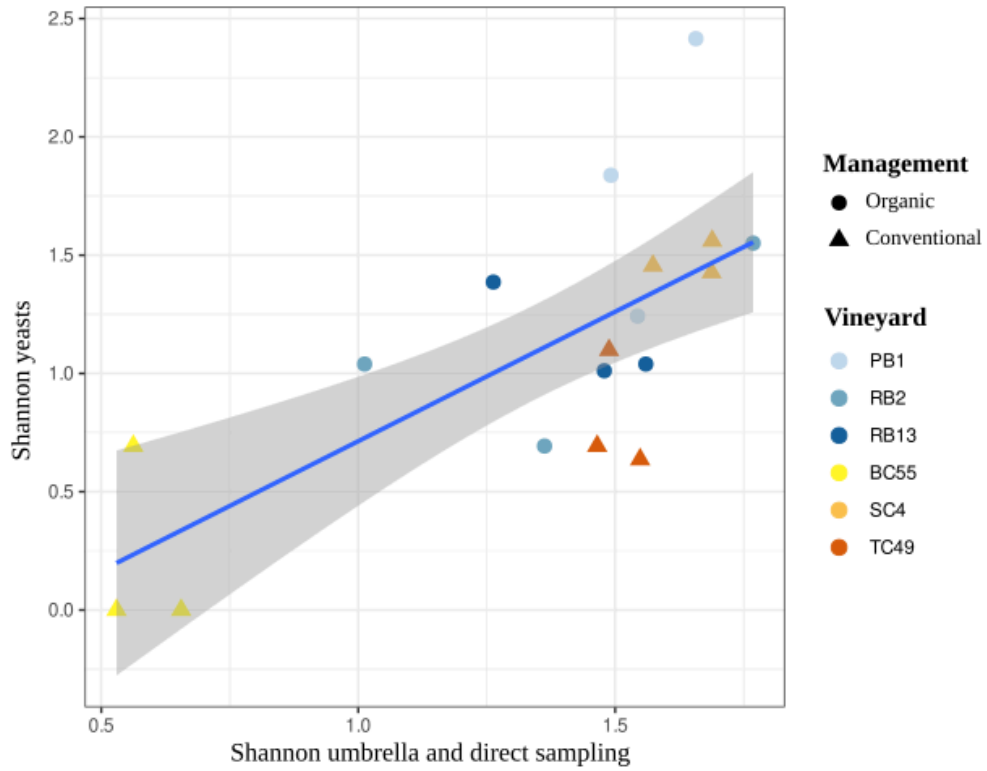

### Supplementary Figure 10

**Yeast vectoring potential of insects.** The plot shows, for each isolated yeast species, the % of vector insects, calculated as the percentage of individuals providing strains of the 18 isolated yeast species (% vector insects). Red dots indicate the insect order showing a % of insects vectoring the corresponding yeast species significantly higher than the % of insects belonging to other orders vectoring the same yeast species (Wilcoxon-Mann-Whitney test,  $fdr < 0.05$ ).

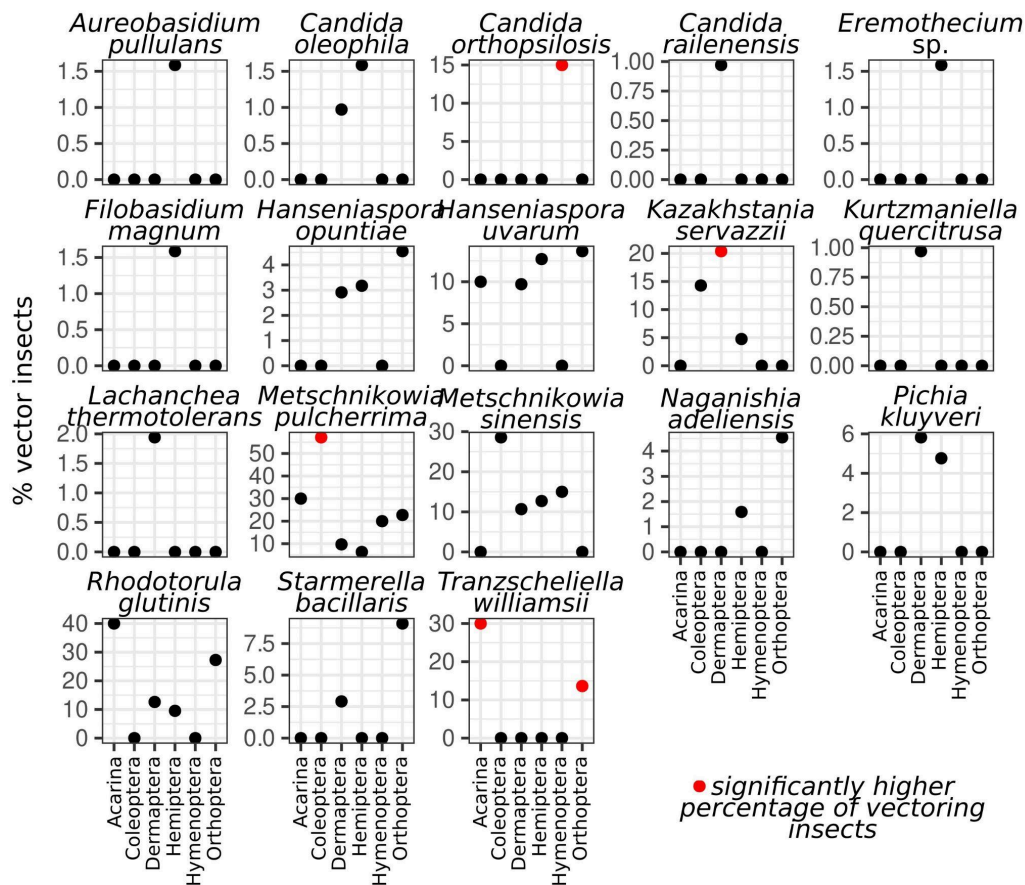

### Supplementary Figure 11

**Associations between insect vectors and yeast species.** The plot shows, for each insect microbiologically analyzed, the number of microorganisms isolated. Red dots indicate the microorganisms most frequently isolated from the corresponding insect order (Wilcoxon-Mann-Whitney test,  $fdr < 0.05$ ).

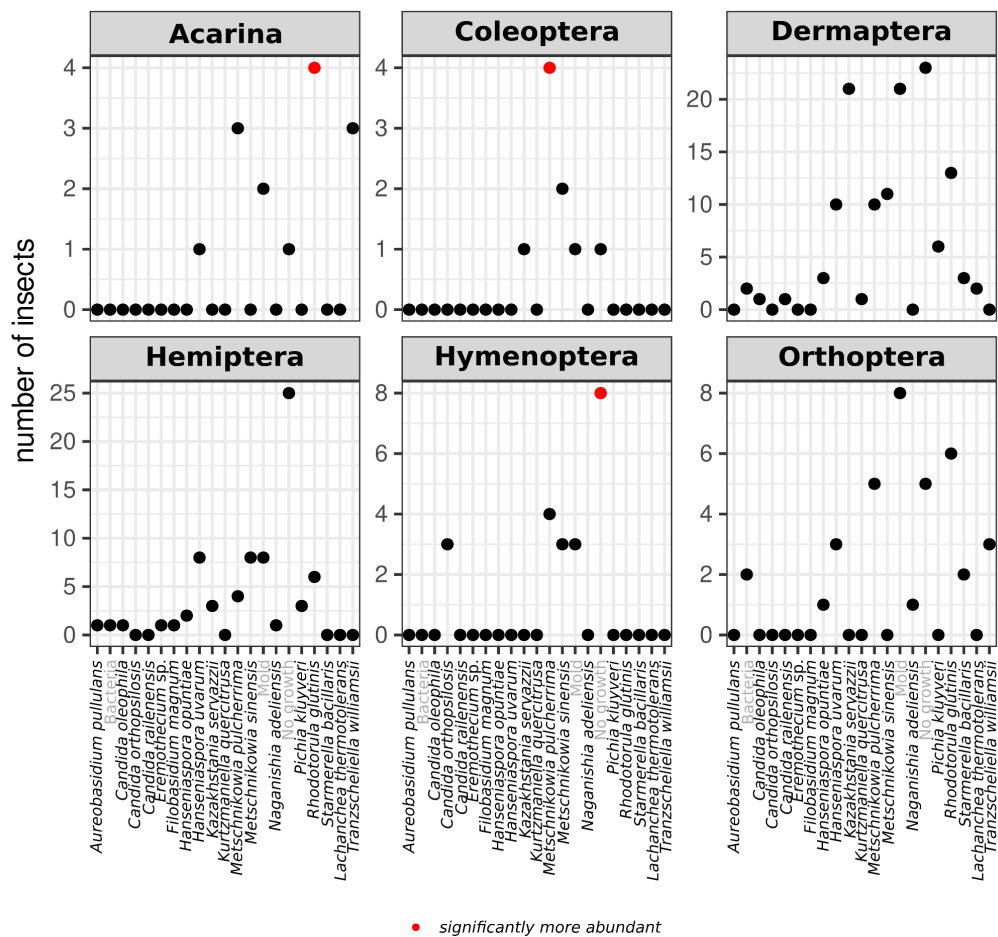

## Supplementary Figure 12

### Multi-level correlations among orthoptera and environmental matrix features.

Correlations between orthoptera monitored through direct sampling, orthoptera monitored through malaise sampling, and Lepidoptera monitored through visual census and environmental matrix features.

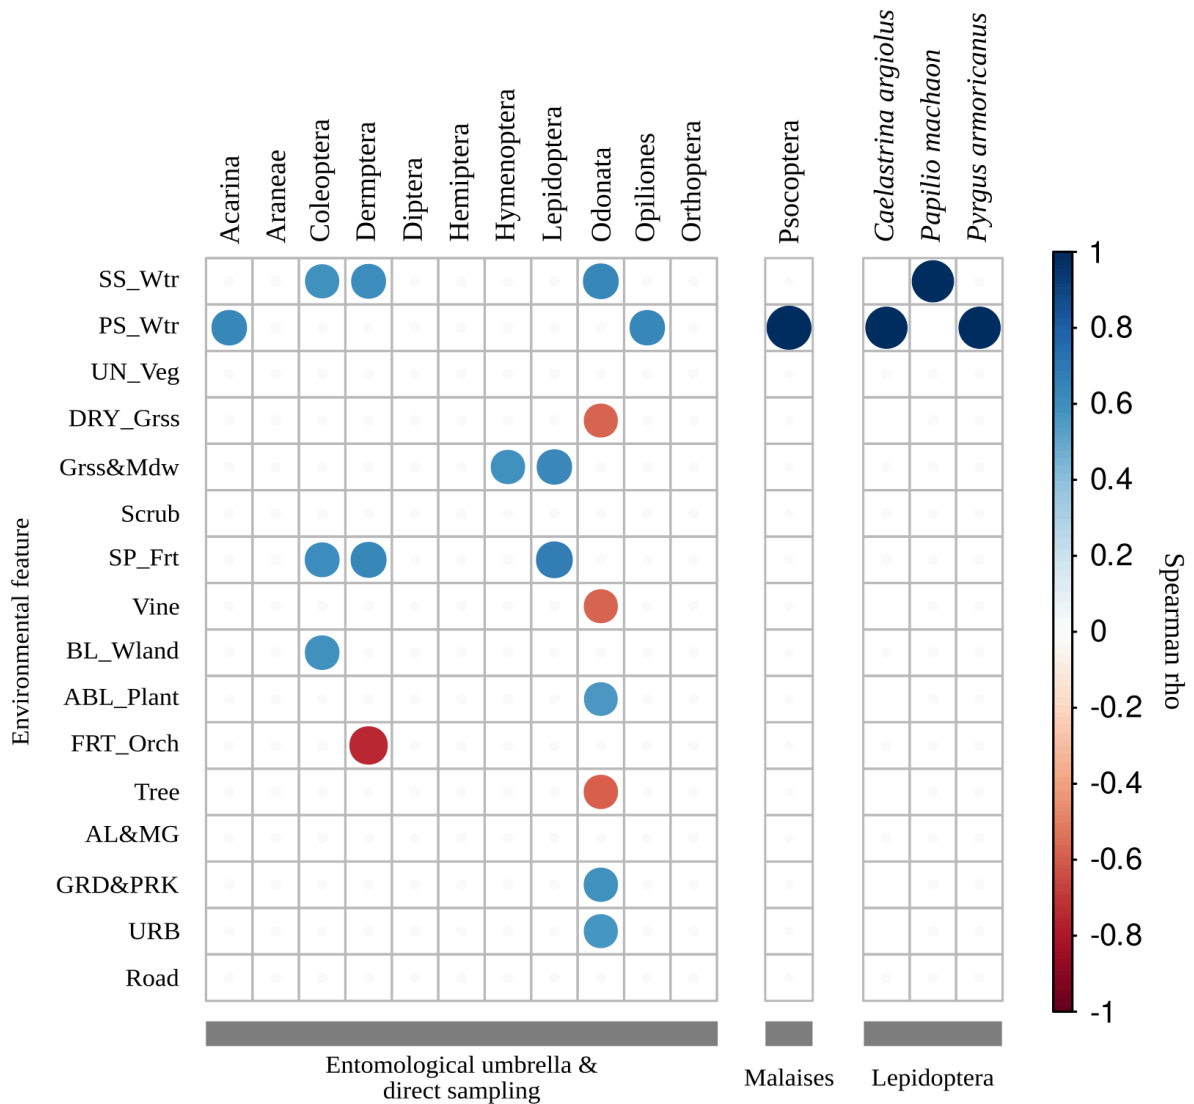

Supplement: 41598_2024_70327_MOESM4_ESM.pdf [file 41598_2024_70327_MOESM4_ESM.pdf]
